# Supplementary material
Source: publisher site journal article supplement (https://static.cambridge.org/content/id/urn:cambridge.org:id:article:S1365100518000731/resource/name/S1365100518000731supp001.pdf)
Supplement: Supplementary file 1 [file S1365100518000731supp001.pdf]

## 6 Online Appendix (Not Intended for Publication)

### 6.1 Additional Simulation Results

#### 6.1.1 Loss Function Surfaces for Alternate Gain Values

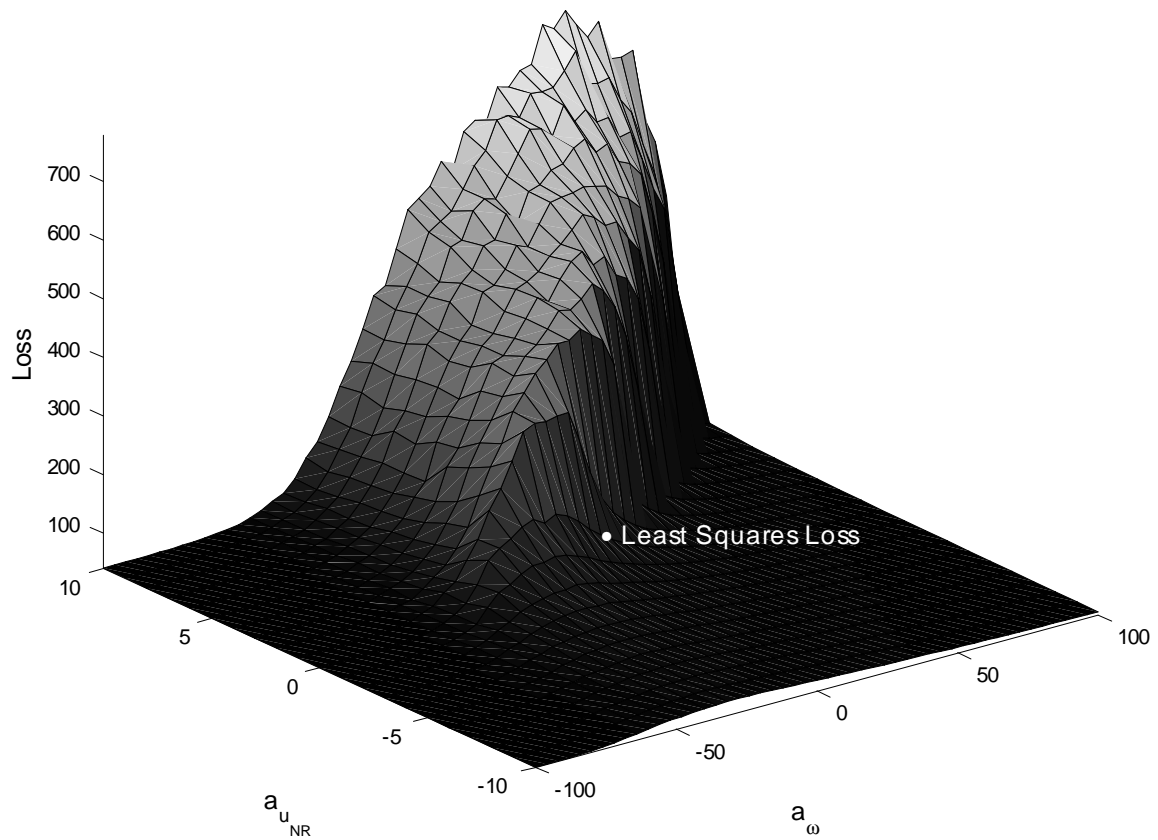

Figure 13. Loss Function ( $L(x_t)$ , 0.0025 gain).

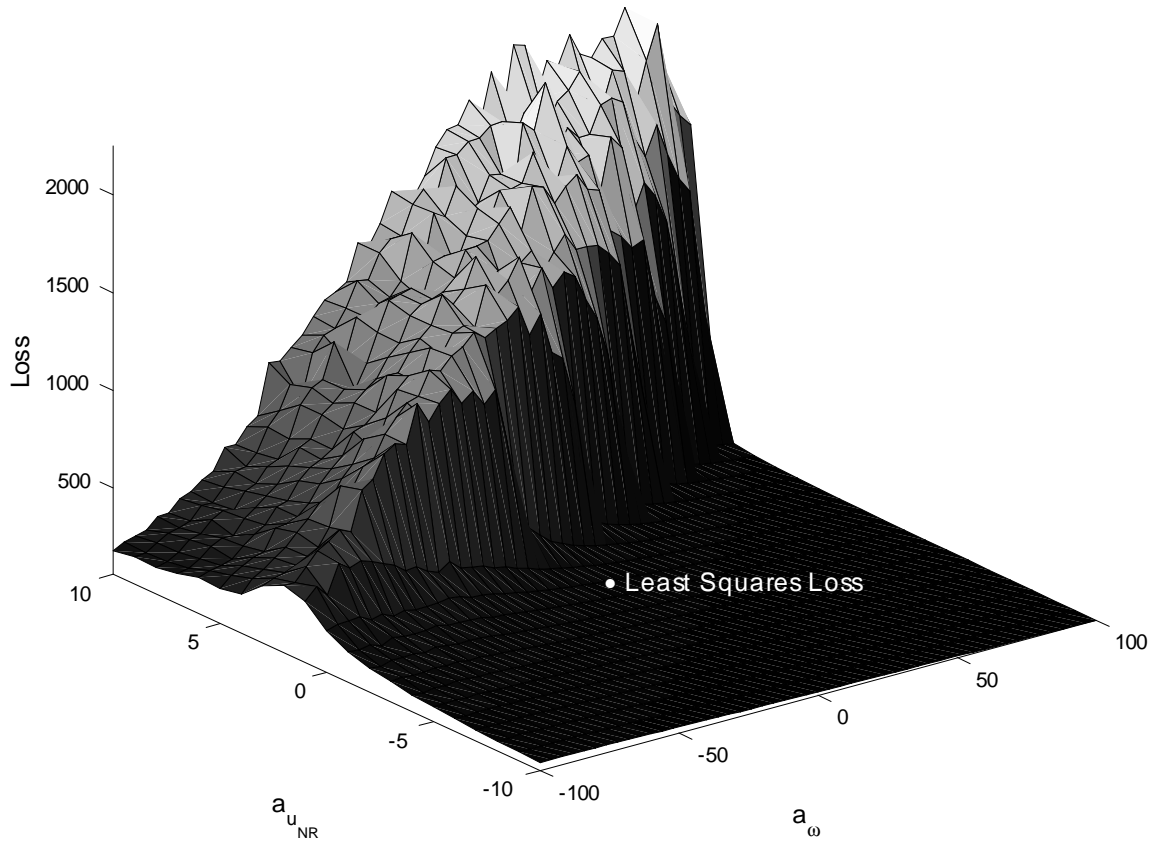

Figure 14. Loss Function ( $L(x_t)$ , 0.1 gain).

### 6.1.2 Additional Time Paths

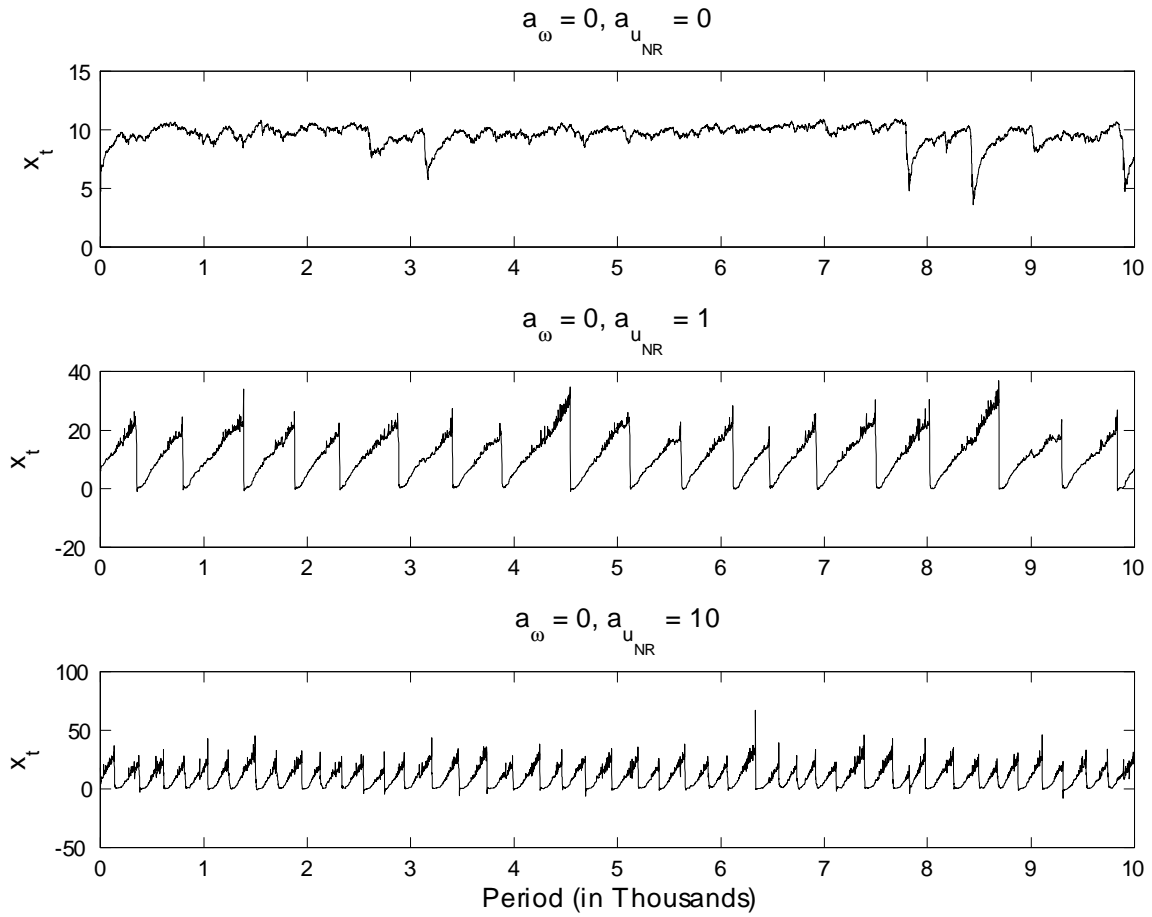

Figure 15. Targeted Inflation ( $a_\omega = 0, a_{u_{NR}} > 0$ ).

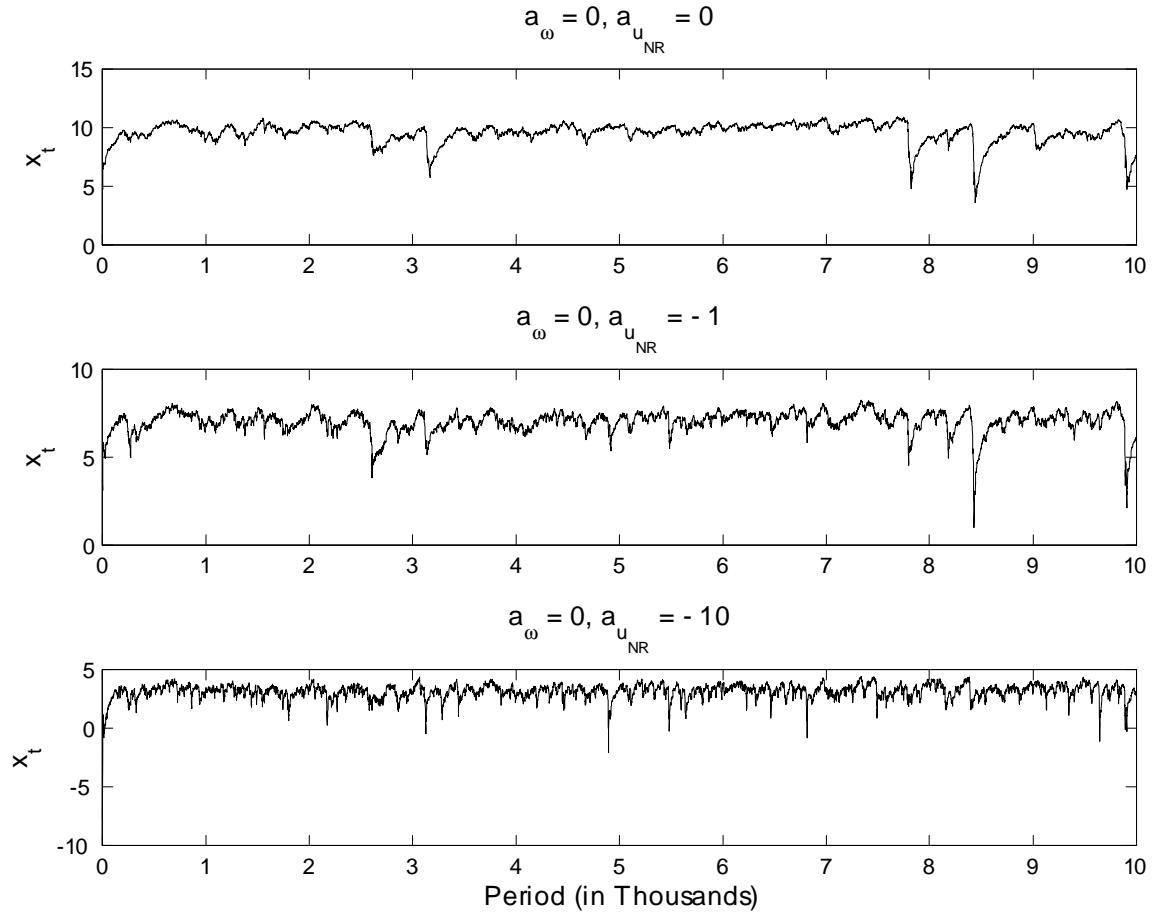

Figure 16. Targeted Inflation ( $a_{\omega} = 0, a_{u_{NR}} < 0$ ).

## 6.2 On the Value of the Precautionary Parameter

Let  $a_t$  be the slope precautionary parameter employed at time  $t$ , and let  $l_t$  be the resulting loss. We define

$$L_t(a) = \sum_{s=0}^t l_s I(a_s = a)$$

as the total loss incurred as of time  $t$  when the precautionary parameter was  $a$ , where  $I(\phi)$  is an indicator function that is 1 if  $\phi$  is true and 0 otherwise. We define

$$L_t^2(a) = \sum_{s=0}^t l_s^2 I(a_s = a)$$

as the total squared loss incurred as of time  $t$  when the precautionary parameter was  $a$  and

$$n_t(a) = \sum_{s=0}^t I(a_s = a)$$

as the number of periods as of time  $t$  when the precautionary parameter was  $a$ . Thus the average loss as of time  $t$  when the parameter was  $a$  will be

$$\Lambda_t(a) = \frac{L_t(a)}{n_t(a)},$$

and the standard error estimate will be

$$\sigma_t(a) = \sqrt{\frac{\frac{L_t^2(a)}{n} - \Lambda_t(a)^2}{n_t(a)}}.$$

Also define

$$Z_t(a, b) = \frac{\Lambda_t(a) - \Lambda_t(b)}{\sqrt{\sigma_t(a)^2 + \sigma_t(b)^2}}$$

to be the  $Z$  score for comparison of  $L_t(a)$  with  $L_t(b)$ .

Let  $T > 0$  be an experimental time span. Let  $\varepsilon > 0$  be the absolute value of the optimal precautionary parameter according to Section 2.2 and let  $\phi^* > 0$  be the critical value of the

Z score for comparing  $L_t(a)$  at different values of  $a$ . We propose the following algorithm:

1. If the optimal parameter is  $\tilde{a}$ , employ it for  $T$  periods,  $\tilde{a} - \varepsilon$  for  $T$  periods, and  $\tilde{a} + \varepsilon$  for  $T$  periods.
2. If  $-\phi^* < Z_t(\tilde{a}, \tilde{a} - \varepsilon) < \phi^*$  and  $-\phi^* < Z_t(\tilde{a}, \tilde{a} + \varepsilon) < \phi^*$ , there is no significant evidence so return to Step 1.
3. If  $Z_t(\tilde{a}, \tilde{a} - \varepsilon) \leq -\phi^*$  and  $Z_t(\tilde{a}, \tilde{a} + \varepsilon) \leq -\phi^*$ , conclude a minimum, and employ  $\tilde{a}$  until  $\Lambda_t(\tilde{a}) > \Lambda_t(\tilde{a} - \varepsilon)$  or  $\Lambda_t(\tilde{a}) > \Lambda_t(\tilde{a} + \varepsilon)$ , in which case go back to Step 1 and recheck that  $\tilde{a}$  is a minimum.
4. If  $Z_t(\tilde{a}, \tilde{a} - \varepsilon) > \phi^*$  or  $Z_t(\tilde{a}, \tilde{a} + \varepsilon) > -\phi$ , conclude that  $\tilde{a}$  is not a minimum. Let

$$a' = \begin{cases} \tilde{a} - \varepsilon & \Lambda_t(\tilde{a} - \varepsilon) < \Lambda_t(\tilde{a} + \varepsilon) \\ \tilde{a} + \varepsilon & \Lambda_t(\tilde{a} - \varepsilon) \geq \Lambda_t(\tilde{a} + \varepsilon) \end{cases}.$$

If  $\Lambda_t(\tilde{a} + \varepsilon) - 2\Lambda_t(\tilde{a}) + \Lambda_t(\tilde{a} - \varepsilon) > 0$ , the loss function is locally convex and

$$a'' = a' - \varepsilon \frac{\Lambda_t(\tilde{a} + \varepsilon) - \Lambda_t(\tilde{a} - \varepsilon)}{\Lambda_t(\tilde{a} + \varepsilon) - 2\Lambda_t(\tilde{a}) + \Lambda_t(\tilde{a} - \varepsilon)}$$

is the result of taking a Newton step from  $a'$ . Employ the parameter  $a''$  for a maximum of  $T$  periods as long as  $Z_t(a'', a') \in (-\phi^*, \phi^*)$ . If  $Z_t(a'', a') \leq -\phi^*$  (or  $Z_t(a'', a') < 0$  after  $T$  periods), return to step 1 with  $\tilde{a} = a''$ .

5. Let  $\tilde{\varepsilon} = \mp \varepsilon$  if  $a' \lessgtr \tilde{a}$ . Try  $a' + \tilde{\varepsilon}$  for a maximum of  $T$  periods as long as  $Z_t(a' + \tilde{\varepsilon}, a') \in (-\phi^*, \phi^*)$ . If  $Z_t(a' + \tilde{\varepsilon}, a') \geq \phi^*$  (or  $Z_t(a' + \tilde{\varepsilon}, a') \geq 0$  after  $T$  periods), return to step 1

with  $\tilde{a} = a'$ . If  $Z_t(a' + \tilde{\varepsilon}, a') \leq -\phi^*$  (or  $Z_t(a' + \tilde{\varepsilon}, a') < 0$  after  $T$  periods), let  $a' = a' + \tilde{\varepsilon}$ , double  $\tilde{\varepsilon}$ , and repeat step 5.
